# Supplementary material for: Liver transcriptome analysis reveals extensive transcriptional plasticity during acclimation to low salinity in Cynoglossus semilaevis
Source: PubMed Central journal article supplement (PMC6006554; doi:10.1186/s12864-018-4825-4), 2018-06-18

## Pearson correlation between samples

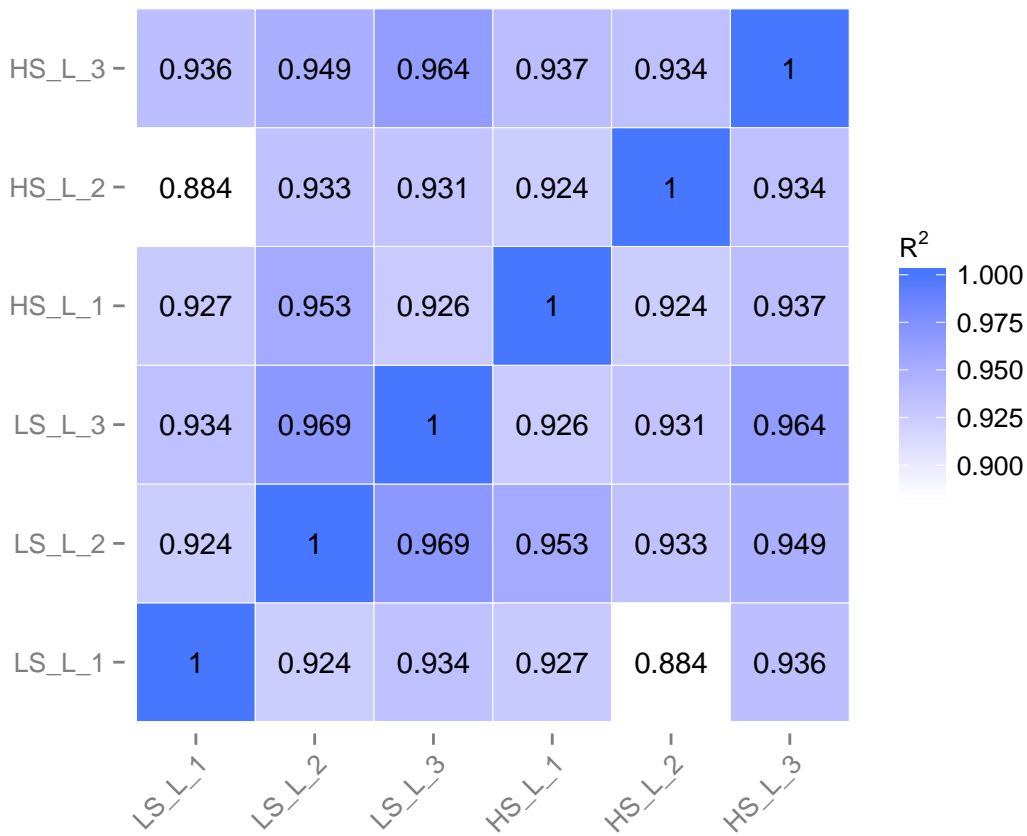

Supplement: 12864_2018_4825_MOESM2_ESM.pdf [file 12864_2018_4825_MOESM2_ESM.pdf]
